# Supplementary material for: Intraspecies Genomic Diversity and Long-Term Persistence of Bifidobacterium longum
Source: PubMed Central journal article supplement (PMC4537262; doi:10.1371/journal.pone.0135658), 2015-08-14
Supplement: pone.0135658.s014.pdf [file pone.0135658.s014.pdf]

**Table S1. Housekeeping genes used for phylogenetic analysis.**

| <b>Gene abbr.</b> | <b>Product</b>                                                                                  |
|-------------------|-------------------------------------------------------------------------------------------------|
| <i>ackA</i>       | Acetate kinase                                                                                  |
| <i>aspS</i>       | Aspartyl-tRNA synthetase                                                                        |
| <i>cysS</i>       | Cysteinyl-tRNA synthetase                                                                       |
| <i>ddl</i>        | D-alanyl-D-alanine synthetase A                                                                 |
| <i>dnaK</i>       | chaperone DnaK                                                                                  |
| <i>dnaX</i>       | DNA polymerase III subunits $\gamma$ and $\tau$                                                 |
| <i>eno</i>        | Enolase                                                                                         |
| <i>frr</i>        | Ribosome recycling factor                                                                       |
| <i>ftsZ</i>       | Cell division protein FtsZ                                                                      |
| <i>fusA</i>       | Elongation factor G                                                                             |
| <i>glmS</i>       | Glucosamine-fructose-6-phosphate aminotransferase                                               |
| <i>groL</i>       | Chaperonin GroEL                                                                                |
| <i>groS</i>       | Co- chaperonin GroES                                                                            |
| <i>gyrA</i>       | DNA gyrase subunit A                                                                            |
| <i>holA</i>       | DNA polymerase III subunit $\delta$                                                             |
| <i>ldh2</i>       | Lactate dehydrogenase                                                                           |
| <i>ligA</i>       | DNA ligase                                                                                      |
| <i>murA</i>       | UDP-N-acetylglucosamine 1-carboxyvinyltransferase                                               |
| <i>murC</i>       | UDP-N-acetylmuramate-alanine ligase                                                             |
| <i>murE</i>       | UDP-N-acetylmuramoylalanyl-D-glutamate-2, 6-diaminopimelate ligase                              |
| <i>murI</i>       | Glutamate racemase                                                                              |
| <i>pgm</i>        | Phosphoglucomutase                                                                              |
| <i>polA</i>       | DNA polymerase I                                                                                |
| <i>ppa</i>        | Inorganic pyrophosphatase                                                                       |
| <i>prfA</i>       | Protein releasing factor                                                                        |
| <i>proS</i>       | Prolyl-tRNA synthetase                                                                          |
| <i>purA</i>       | Adenylosuccinate synthetase                                                                     |
| <i>purB</i>       | Adenylosuccinate lyase                                                                          |
| <i>purF</i>       | Glutamine phosphoribosylpyrophosphate amidotransferase                                          |
| <i>purH</i>       | Bifunctional 5'-phosphoribosyl 5-aminoimidazole-4-carboxamide transformylase-IMP cyclohydrolase |
| <i>pyrK</i>       | Dihydroorotate dehydrogenase electron transfer subunit                                          |
| <i>recA</i>       | Recombinase A                                                                                   |
| <i>rho</i>        | Transcription termination factor Rho                                                            |
| <i>rplY</i>       | 50S ribosomal protein L25                                                                       |
| <i>rpoA</i>       | DNA-directed RNA polymerase subunit $\alpha$                                                    |
| <i>rpoC</i>       | DNA-directed RNA polymerase subunit $\beta'$                                                    |
| <i>rpoD</i>       | RNA polymerase $\sigma$ factor                                                                  |
| <i>rpoZ</i>       | DNA-directed RNA polymerase subunit $\omega$                                                    |
| <i>rpsO</i>       | 30S ribosomal protein S15                                                                       |
| <i>tig</i>        | Trigger factor                                                                                  |
| <i>tkt</i>        | Transketolase                                                                                   |
| <i>topA</i>       | DNA topoisomerase I                                                                             |
| <i>trpS</i>       | Tryptophanyl-tRNA synthetase                                                                    |
