# Supplementary material for: Intraspecies Genomic Diversity and Long-Term Persistence of Bifidobacterium longum
Source: PubMed Central journal article supplement (PMC4537262; doi:10.1371/journal.pone.0135658), 2015-08-14
Supplement: pone.0135658.s015.pdf [file pone.0135658.s015.pdf]

| Strain name             | GenBank accession number | Genome sequence status | Sequencing technology | Coverage     | N50, bp   | Sequence length, Mbp | Subspecies identified in this study |
|-------------------------|--------------------------|------------------------|-----------------------|--------------|-----------|----------------------|-------------------------------------|
| ATCC 15697 <sup>T</sup> | NC_011593                | Complete               | Sanger                | 8x           | 2,832,748 | 2.83                 | <i>infantis</i>                     |
| EK3                     | JNWC00000000             | 45 contigs             | Illumina              | 1161x        | 184,521   | 2.56                 | <i>infantis</i>                     |
| AGR2137                 | ATWX00000000             | 49 contigs             | Illumina              | Not provided | 79,605    | 2.27                 | <i>suis</i>                         |
| JDM301                  | NC_014169                | Complete               | 454                   | 16x          | 2,477,838 | 2.48                 | <i>suis</i>                         |
| LMG 21814 <sup>T</sup>  | JGZA00000000             | 36 contigs             | Ion Torrent           | 71x          | 96,45     | 2.34                 | <i>suis</i>                         |
| 12_1_47BFAA             | NZ_ADCN00000000          | 86 contigs             | 454                   | 34x          | 60,093    | 2.40                 | <i>longum</i>                       |
| 157F                    | NC_015052                | Complete               | Sanger                | 7.8x         | 2,400,312 | 2.40                 | <i>longum</i>                       |
| 1-5B                    | JNVX00000000             | 28 contigs             | Illumina              | 3037x        | 286,86    | 2.37                 | <i>longum</i>                       |
| 17-1B                   | JNVZ00000000             | 23 contigs             | Illumina              | 2001x        | 247,559   | 2.47                 | <i>longum</i>                       |
| 1-6B                    | AJTF00000000             | 171 contigs            | 454                   | 14x          | 58,499    | 2.69                 | <i>longum</i>                       |
| 2-2B                    | AJTJ00000000             | 141 contigs            | 454                   | 11x          | 39,901    | 2.63                 | <i>longum</i>                       |
| 35B                     | AJTI00000000             | 131 contigs            | 454                   | 11x          | 57,033    | 2.51                 | <i>longum</i>                       |
| 44B                     | AJTM00000000             | 62 contigs             | 454                   | 25x          | 90,207    | 2.56                 | <i>longum</i>                       |
| 72B                     | JNWA00000000             | 39 contigs             | Illumina              | 1059x        | 186,419   | 2.37                 | <i>longum</i>                       |
| 7-1B                    | JNVY00000000             | 37 contigs             | Illumina              | 2814x        | 435,415   | 2.41                 | <i>longum</i>                       |
| ATCC 55813              | ACHI00000000             | 140 contigs            | 454                   | 53x          | 137,057   | 2.37                 | <i>longum</i>                       |
| BBMN68                  | NC_014656                | Complete               | 454                   | 38x          | 2,265,943 | 2.27                 | <i>longum</i>                       |
| CCUG 52486              | NZ_ABQQ00000000          | 55 contigs             | 454                   | 34x          | 171,444   | 2.45                 | <i>longum</i>                       |
| CECT 7347               | NZ_CALH00000000          | 128 contigs            | 454                   | 32x          | 39,694    | 2.33                 | <i>longum</i>                       |
| DJO10A                  | NC_010816                | Complete               | Sanger                | 9.2x         | 2,375,792 | 2.38                 | <i>longum</i>                       |
| E18                     | AUYD00000000             | 7 contigs              | 454                   | 19.6x        | 1,251,618 | 2.37                 | <i>longum</i>                       |
| F8                      | NC_021008                | 21 contigs             | 454                   | 45x          | 230,054   | 2.37                 | <i>longum</i>                       |
| EK5                     | JNWC00000000             | 35 contigs             | Illumina              | 1417x        | 254,81    | 2.23                 | <i>longum</i>                       |
| EK13                    | JNWD00000000             | 48 contigs             | Illumina              | 1337x        | 303,761   | 2.47                 | <i>longum</i>                       |
| JCM 1217 <sup>T</sup>   | NC_015067                | Complete               | Sanger                | 7.6x         | 2,385,164 | 2.39                 | <i>longum</i>                       |
| KACC 91563              | NC_017221                | Complete               | 454                   | 222x         | 2,385,301 | 2.39                 | <i>longum</i>                       |
| NCC2705                 | NC_004307                | Complete               | Sanger                | 8x           | 2,256,640 | 2.26                 | <i>longum</i>                       |
| VMKB44                  | JRWN00000000             | 36 contigs             | Illumina              | 913x         | 177,067   | 2.51                 | <i>longum</i>                       |
